# Supplementary material for: Heterometallic Cu/Ln cluster chemistry: ferromagnetically-coupled {Cu4Ln2} complexes exhibiting single-molecule magnetism and magnetocaloric properties
Source: Royal Society of Chemistry journal article supplement (doi:10.1039/c8dt01780h), 2018-01-01
Supplement: c8dt01780h1.pdf [file c8dt01780h1.pdf]

## ELECTRONIC SUPPORTING INFORMATION

### **Heterometallic Cu/Ln cluster chemistry: Ferromagnetically-coupled {Cu<sub>4</sub>Ln<sub>2</sub>} complexes exhibiting single-molecule magnetism and magnetocaloric properties**

Dimitris I. Alexandropoulos,<sup>a</sup> Luis Cunha-Silva,<sup>b</sup> Jinkui Tang,<sup>c</sup> and Theocharis C. Stamatatos\*<sup>a</sup>

<sup>a</sup> *Department of Chemistry, 1812 Sir Isaac Brock Way, Brock University, L2S 3A1 St. Catharines, Ontario, Canada. E-mail: tstamatatos@brocku.ca; Tel: (+1)-905-688-5550 Ext. 3400*

<sup>b</sup> *REQUIMTE-LAQV & Department of Chemistry and Biochemistry, Faculty of Sciences, University of Porto, 4169-007 Porto, Portugal*

<sup>c</sup> *State Key Laboratory of Rare Earth Resource Utilization, Changchun Institute of Applied Chemistry, Chinese Academy of Sciences, Changchun 130022, P. R. China*

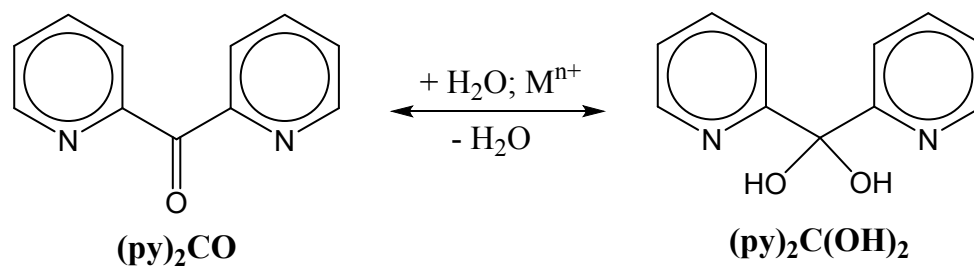

**Scheme S1.** Structural formulae and abbreviations of the ligands discussed in the text.

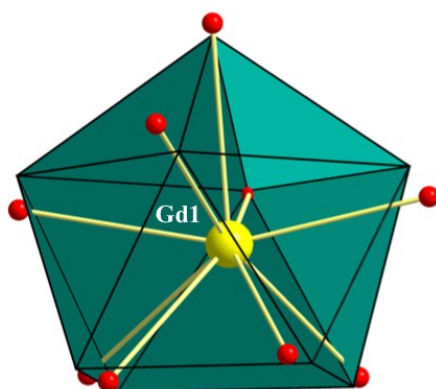

**Figure S1.** Spherical capped square antiprismatic coordination geometry of the  $\text{Gd}^{3+}$  ions in **1**.

Points connected by the black thin lines define the vertices of the ideal polyhedron.

**Table S1.** SHAPE measures of the 9-coordinate lanthanide coordination polyhedra.

| Polyhedron <sup>a,b</sup> | Gd1         | Tb1         | Dy1         |
|---------------------------|-------------|-------------|-------------|
| EP-9                      | 36.18       | 36.22       | 36.40       |
| OPY-9                     | 21.25       | 21.21       | 21.23       |
| HBPY-9                    | 17.77       | 17.96       | 17.87       |
| JTC-9                     | 14.93       | 15.00       | 14.99       |
| JCCU-9                    | 9.16        | 9.18        | 9.15        |
| CCU-9                     | 8.06        | 8.10        | 8.07        |
| JCSAPR-9                  | 3.50        | 3.41        | 3.31        |
| CSAPR-9                   | <b>2.48</b> | <b>2.46</b> | <b>2.29</b> |

|          |       |       |       |
|----------|-------|-------|-------|
| JTCTPR-9 | 4.55  | 4.42  | 4.29  |
| TCTPR-9  | 2.74  | 2.61  | 2.50  |
| JTDIC-9  | 10.69 | 10.53 | 10.58 |
| HH-9     | 10.85 | 10.87 | 10.92 |
| MFF-9    | 2.84  | 2.82  | 2.68  |

<sup>a</sup> Abbreviations: EP-9, enneagon; OPY-9, octagonal pyramid; HBPY-9, Heptagonal bipyramid; JTC-9, Johnson triangular cupola J3; JCCU-9, capped cube J8; CCU-9, spherical-relaxed capped cube; JCSAPR-9, capped square antiprism J10; CSAPR-9, spherical capped square antiprism; JTCTPR-9, tricapped trigonal prism J51; TCTPR-9, spherical tricapped trigonal prism; JTDIC-9, tridiminished icosahedron J63; HH-9, hula-hoop; MFF-9, muffin.

<sup>b</sup> The values in boldface indicate the closest polyhedron according to the Continuous Shape Measures.

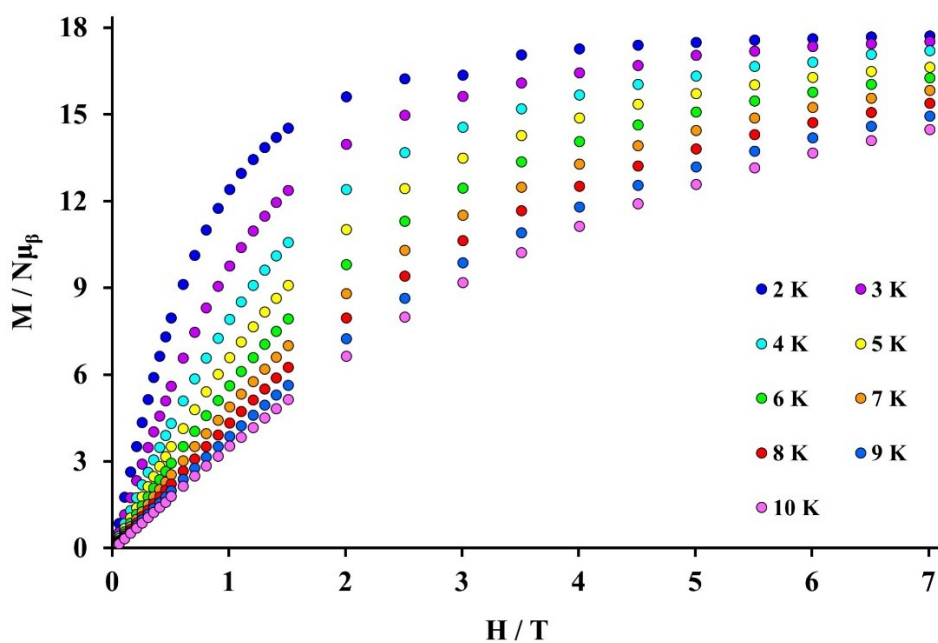

**Figure S2.** Isothermal magnetization ( $M$ ) curves for complex **1** in the 2 to 10 K range.

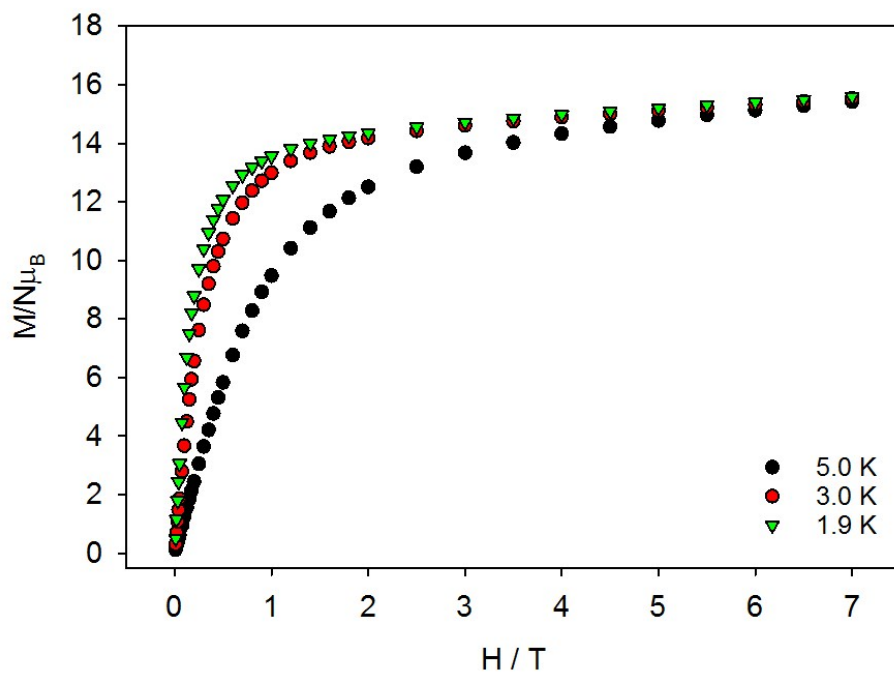

**Figure S3.** Magnetization ( $M$ ) vs field ( $H$ ) plots for complex **2** at various low temperatures.

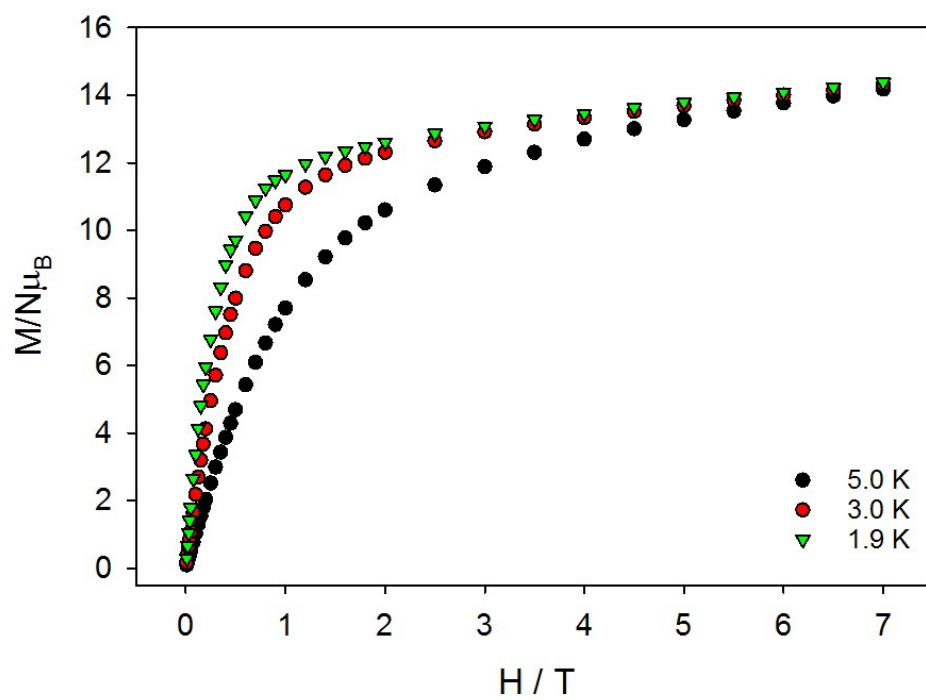

**Figure S4.** Magnetization ( $M$ ) vs field ( $H$ ) plots for complex **3** at various low temperatures.

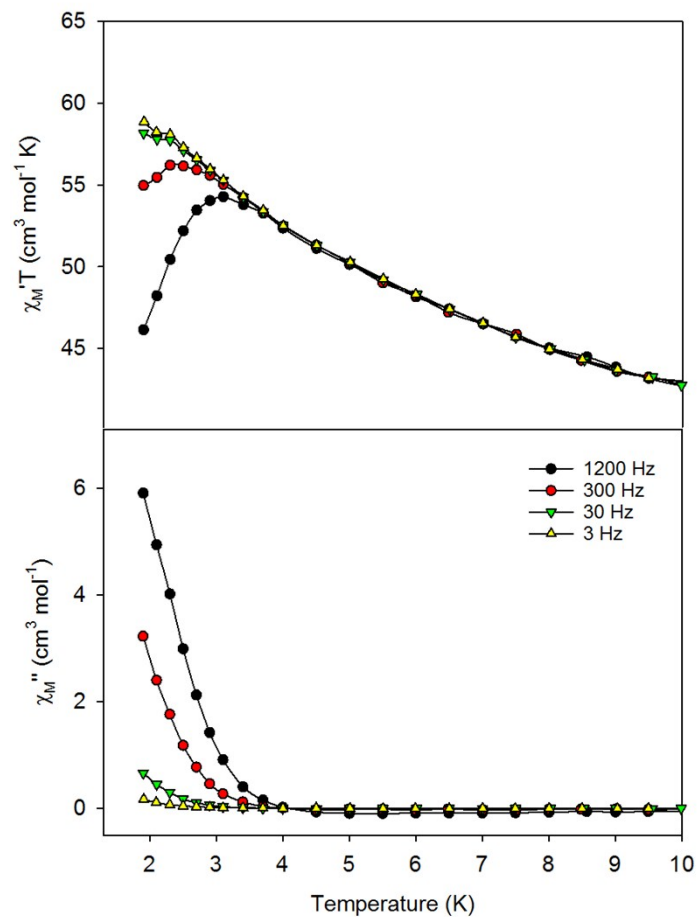

**Figure S5.** Temperature dependence of the in-phase  $\chi_M' T$  product (top) and out-of-phase  $\chi_M''$  (bottom) *ac* susceptibility signals of **2** in a 3.0 G field oscillating at the indicated frequencies.

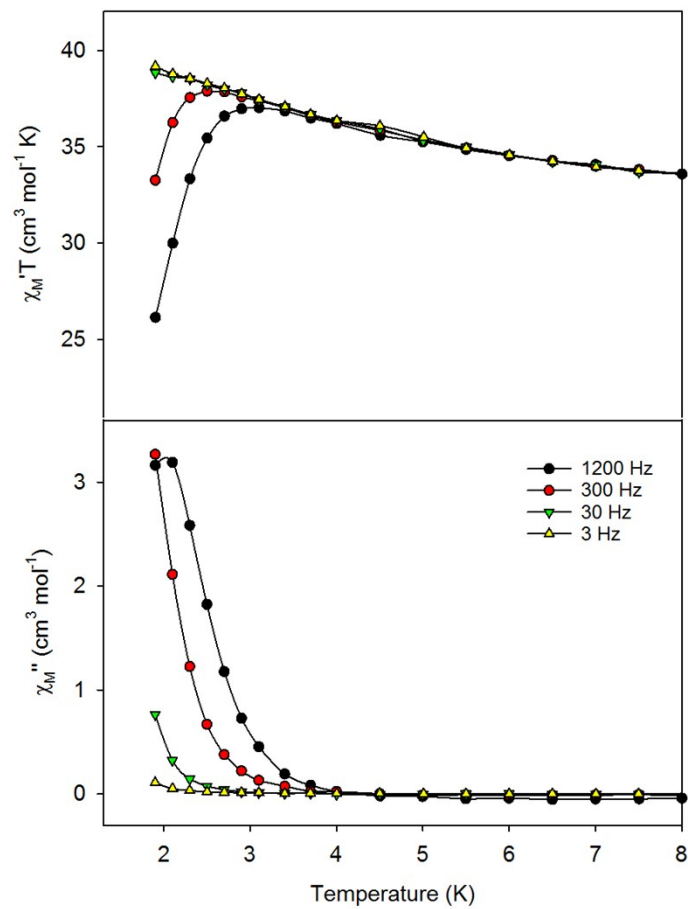

**Figure S6.** Temperature dependence of the in-phase  $\chi_M' T$  product (top) and out-of-phase  $\chi_M''$  (bottom) *ac* susceptibility signals of **3** in a 3.0 G field oscillating at the indicated frequencies.
